# Supplementary material for: Long-lasting renewable antibacterial porous polymeric coatings enable titanium biomaterials to prevent and treat peri-implant infection
Source: PubMed Central journal article supplement (PMC8175680; doi:10.1038/s41467-021-23069-0), 2021-06-03
Supplement: 41467_2021_23069_MOESM1_ESM.pdf [file 41467_2021_23069_MOESM1_ESM.pdf]

# Supplementary Information

## Long-lasting Renewable Antibacterial Porous Polymeric Coatings Enable Titanium Biomaterials to Prevent and Treat Peri-implant Infection

Shuyi Wu<sup>1,†</sup>, Jianmeng Xu<sup>1,†</sup>, Leiyan Zou<sup>1,†</sup>, Shulu Luo<sup>1</sup>, Run Yao<sup>1</sup>, Bingna Zheng<sup>2</sup>, Guobin Liang<sup>1</sup>, Dingcai Wu<sup>2\*</sup> & Yan Li<sup>1\*</sup>

<sup>1</sup> Department of Prosthodontics, Hospital of Stomatology, Guanghua School of Stomatology, Guangdong Provincial Key Laboratory of Stomatology, Sun Yat-sen University, Guangzhou 510055, P. R. China.

<sup>2</sup> Materials Science Institute, PCFM Lab and GDHPRC Lab, School of Chemistry, Sun Yat-sen University, Guangzhou 510275, P.R. China.

<sup>†</sup> Shuyi Wu, Jianmeng Xu and Leiyan Zou contributed equally to this work.

\* Correspondence and requests for materials should be addressed to D.W. (email: wudc@mail.sysu.edu.cn) and Y.L. (email: liy8@mail.sysu.edu.cn).

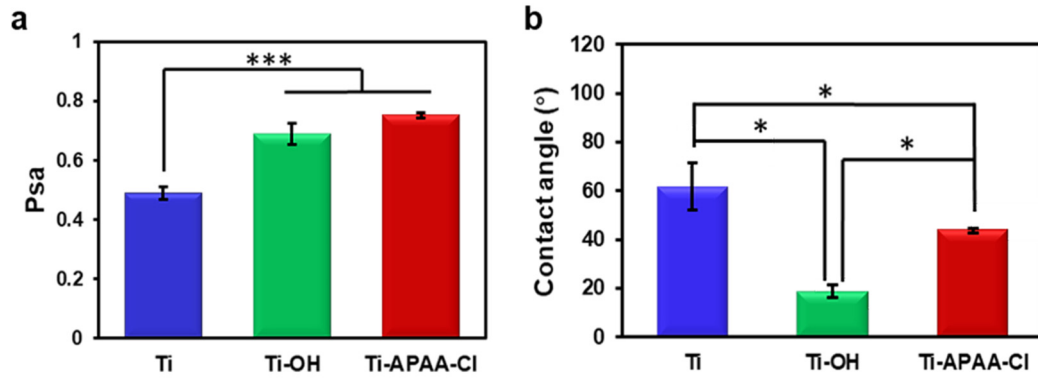

**Supplementary Fig. 1** Roughness and water contact angle of Ti, Ti-OH and Ti-PAA-NCl. **a** Quantitative analysis of roughness ( $n = 3$ ,  $F = 61.626$  and  $P < 0.001$  in one-way ANOVA, \*\*\* indicates  $P < 0.001$  in Bonferroni test). **b** Quantitative analysis of water contact angle ( $n = 3$ ; \* indicates  $P < 0.05$ , Wilcoxon nonparametric test). All error bars = s.d.

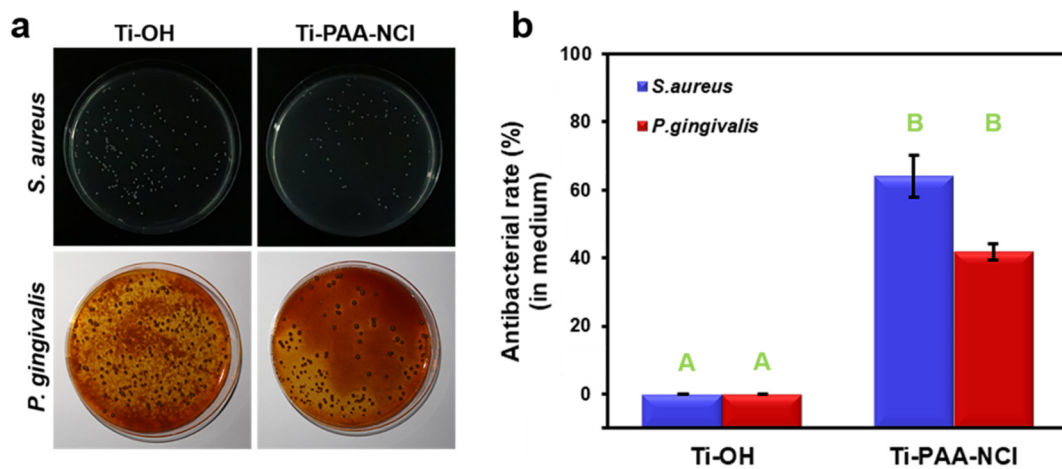

**Supplementary Fig. 2** **a** Images of bacterial colonies formed by *S. aureus* and *P. gingivalis* from culture medium treated with Ti-OH and Ti-PAA-NCl. **b** Antibacterial rates in medium against *S. aureus* and *P. gingivalis* treated with Ti-OH and Ti-PAA-NCl. Significant differences between Ti-OH and Ti-PAA-NCl are marked by different letters ( $n = 3$ ;  $P < 0.01$ ; Student's t test). Error bars = s.d.

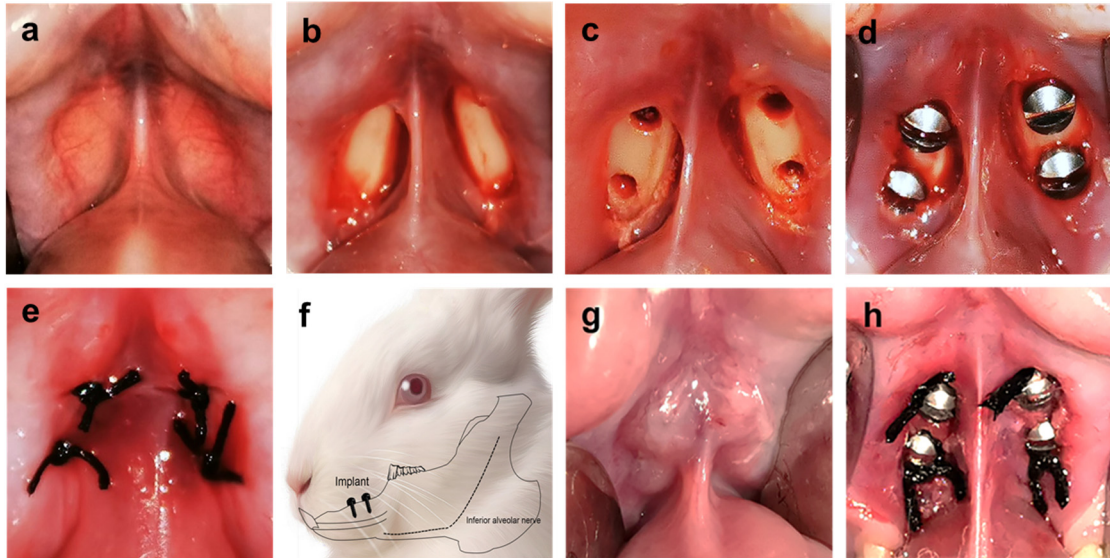

**Supplementary Fig. 3 Processes of *in vivo* animal experiment.** a Rabbit's bilateral edentulous areas of mandible. b Incisions and exposures of implant sites. c Holes drilled for mini-implants. d Implantation of mini-implants. e Closing the incisions by suturing. f Schematic diagram of implantation positions. g Healing of implant sites after 4 weeks. h Silk ligatures placed around the neck of implants with ends left in oral cavity to introduce bacteria.

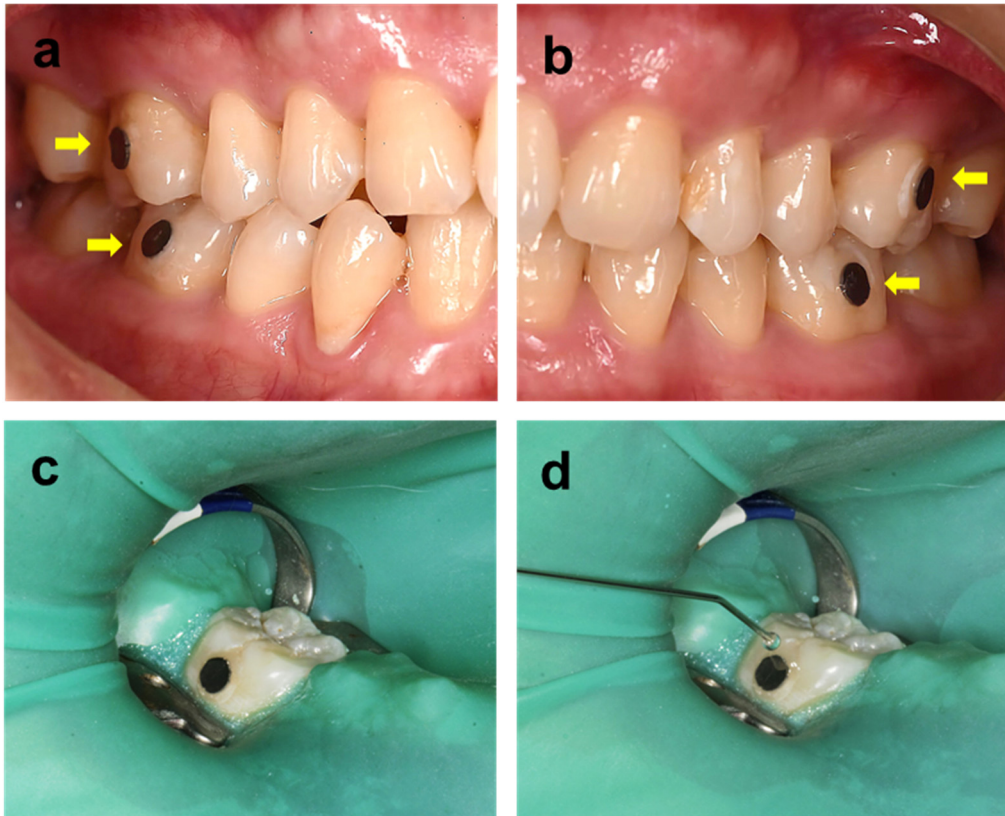

**Supplementary Fig. 4 Processes of human intraoral experiment. a, b** Bonding sites of tiny titanium disks (yellow arrows) on buccal surfaces of upper and lower first molars in volunteers' mouth. **c** Regional exposure of a tiny titanium disk with rubber dam and gum sealant for preparation of rechlorination. **d** Rechlorinating the coating by irrigating with NaOCl solution (5%, pH=7) for 15 min.

**Supplementary Table 1 Inclusion criteria for patients with peri-implantitis**

| <b>SN</b> | <b>Inclusion criteria</b>                                              |
|-----------|------------------------------------------------------------------------|
| 1         | Obvious radiological evidence for vertical destruction of crestal bone |
| 2         | Vertical bone destruction associated with peri-implant pocket          |
| 3         | Bleeding after gentle probing with blunt instrument                    |
| 4         | Tissues might or might not be swollen                                  |

**Supplementary Table 2 Primer sequences used for RT-qPCR**

| <b>Genes</b> | <b>Primers</b>                           |
|--------------|------------------------------------------|
| OCN          | Forward: 5'-GGACCATCTTTCTGCTCACTCTG-3'   |
|              | Reversed: 5'-TTCACCTACCTTATTGCCCTCCTG-3' |
| OPN          | Forward: 5'-CTTTCACCTCCAATCGTCCCTAC-3'   |
|              | Reversed: 5'-CCTTAGACTCACCGCTCTTCAT-3'   |
| RUNX2        | Forward: 5'-AAGTGCGGTGCAAACCTTTCT-3'     |
|              | Reversed: 5'-TCTCGGTGGCTGGTAGTGA-3'      |
| GAPDH        | Forward: 5'-TCGGTGTGAACGGATTTGG-3'       |
|              | Reversed: 5'-TCTCCACTTTGCCACTGCA-3'      |
